# Supplementary material for: Brilliant blue, green, yellow, and red fluorescent diamond particles: synthesis, characterization, and multiplex imaging demonstrations
Source: Royal Society of Chemistry journal article supplement (doi:10.1039/c9nr02593f), 2019-01-01
Supplement: c9nr02593f1.pdf [file c9nr02593f1.pdf]

## Supplementary Information

### Brilliant Blue, Green, Yellow, and Red Fluorescent Diamond Particles: Synthesis, Characterization, and Multiplex Imaging Demonstrations

Nicholas Nunn<sup>1\*</sup>, Neeraj Prabhakar<sup>2</sup>, Phillip Reineck<sup>3</sup>, Valentin Magidson<sup>4</sup>, Erina Kamiya<sup>5</sup>, William F. Heinz<sup>4</sup>, Marco D. Torelli<sup>1</sup>, Jessica Rosenholm<sup>2</sup>, Alexander Zaitsev<sup>6</sup>, Olga Shenderova<sup>1\*</sup>

<sup>1</sup> *Adamas Nanotechnologies, Inc. 8100 Brownleigh Drive, Suite 120 Raleigh, NC 27617, USA*

<sup>2</sup> *Pharmaceutical Sciences Laboratory, Faculty of Science and Engineering, Åbo Akademi University, Tykistokatu 6A, Turku 20520, Finland*

<sup>3</sup> *ARC Centre of Excellence for Nanoscale BioPhotonics & School of Science, RMIT University, Melbourne, VIC 3001, Australia*

<sup>4</sup> *Optical Microscopy and Analysis Laboratory, Cancer Research Technology Program, Frederick National Laboratory for Cancer Research, Frederick, MD 21702, USA*

<sup>5</sup> *Optical Microscopy and Analysis Laboratory, Office of Science and Technology Resources, Center for Cancer Research, National Cancer Institute, National Institutes of Health, Frederick, MD 21702, USA*

<sup>6</sup> *College of Staten Island (CUNY), 2800 Victory Blvd., Staten Island, NY 10312, USA*

*\*Corresponding Authors:*

N. Nunn, [nnunn@adamasnano.com](mailto:nnunn@adamasnano.com);

O. Shenderova, [oshenderova@adamasnano.com](mailto:oshenderova@adamasnano.com)

**Table S1.** Parameters used for brightness comparison shown in Figure 1 of main text.

| Name         | concentration<br>[mg/mL] | concentration<br>[μM] | Assumed<br>particle<br>diameter<br>[nm] | MW<br>[g/mol] | bandpass | longpass | excitation<br>[nm] | ex int<br>[mW] | integration<br>time |
|--------------|--------------------------|-----------------------|-----------------------------------------|---------------|----------|----------|--------------------|----------------|---------------------|
| green FND    | 0.1                      | 5.40E-05              | 120                                     | n.a.          | 450      | 500      | 450                | 44.7           | 5s                  |
| FITC         | 0.00033                  | 1                     | n.a.                                    | 332.31        | 450      | -        | 450                | 44.7           | 5s                  |
| 140 nm<br>NV | 0.1                      | 3.40E-05              | 140                                     | n.a.          | 550      | 600      | 550                | 59.6           | 5s                  |
| AF647        | 0.001                    | 0.769                 | n.a.                                    | 1300          | 600      | -        | 600                | 29.1           | 5s                  |

| <b>Table S2.</b> Optical filters and spectrometers used for imaging demonstrations. |                     |             |                                |                                                                            |
|-------------------------------------------------------------------------------------|---------------------|-------------|--------------------------------|----------------------------------------------------------------------------|
| <b>Part No.</b>                                                                     | <b>Manufacturer</b> | <b>Type</b> | <b>Window<br/>(FWHM width)</b> | <b>Use<br/>(Methods<br/>Section 2)</b>                                     |
| FF01-470/28                                                                         | Semrock             | Band Pass   | 456-484                        | Blue Exc.<br>Filter for<br>(wide field)                                    |
| FF01-517/20                                                                         | Semrock             | Band Pass   | 507-527                        | Green Exc.<br>Filter for<br>(wide field)                                   |
| BLP01-488R                                                                          | Semrock             | Long Pass   | 488-                           | Long Pass<br>Emission<br>filter for blue<br>excitation<br>(wide field)     |
| BLP02-561R                                                                          | Semrock             | Long Pass   | 561-                           | Long Pass<br>Emission<br>filter for<br>green<br>excitation<br>(wide field) |
| HQ535/50                                                                            | Chroma              | Band Pass   | 510-560                        | Green Band<br>Pass<br>Emission for<br>blue<br>excitation<br>(wide field)   |
| HQ610/75                                                                            | Chroma              | Band Pass   | 572-648                        | Red Band<br>Pass<br>Emission for<br>Green<br>Excitation<br>(wide field)    |

| <b>Table S3.</b> Excitation filters and spectroscopy setups for emission spectra in <b>Figure 2.</b> |                                                        |                                                          |                              |
|------------------------------------------------------------------------------------------------------|--------------------------------------------------------|----------------------------------------------------------|------------------------------|
| <b>Microscope</b>                                                                                    | <b>Filter</b>                                          | <b>Spectrometer</b>                                      | <b>Use</b>                   |
| Nikon Eclipse Ti-S<br>Microscope                                                                     | UV-2A Filter                                           | Princeton<br>Instruments Acton<br>SP2150<br>Spectrometer | UV excitation<br>Figure 2a   |
| IX-71 Inverted<br>Epifluorescent<br>Microscope<br>(Olympus)                                          | 470/28 Excitation,<br>with 488 LP Filter<br>(emission) | Ocean Optics<br>HR2000<br>Spectrometer                   | Blue excitation<br>Figure 2b |

| <b>Table S4.</b> Microscope objectives used for wide field fluorescence imaging of labeled polymer microbeads (Olympus IX-71 Microscope) |                                       |                           |             |
|------------------------------------------------------------------------------------------------------------------------------------------|---------------------------------------|---------------------------|-------------|
| <b>Objective</b>                                                                                                                         | <b>Magnification</b>                  | <b>Numerical Aperture</b> | <b>Type</b> |
| UPlan SApo                                                                                                                               | 100x (160x with 1.6x multiplier lens) | 1.4                       | Oil         |
| LUC PlanFL N                                                                                                                             | 40x (64x with 1.6x multiplier lens)   | 0.6                       | Air         |
| PlanC N                                                                                                                                  | 10x (16x with 1.6x multiplier lens)   | 0.25                      | Air         |

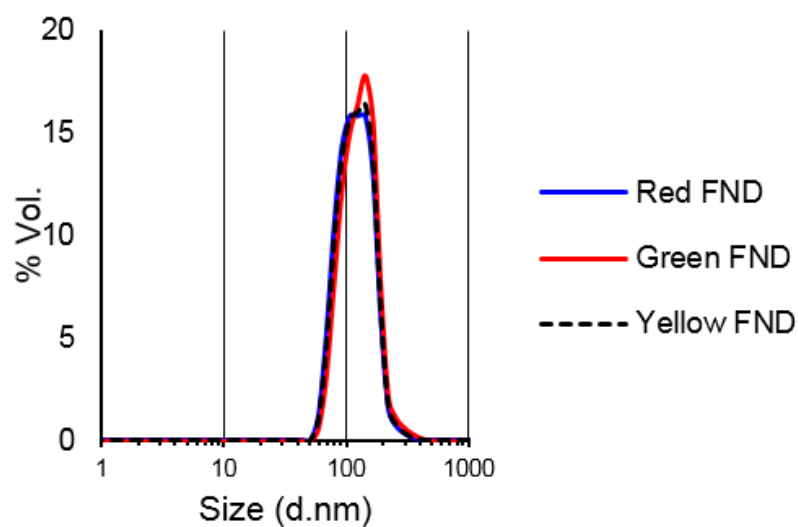

**Figure S1.** Volumetric particle size distributions measured in deionized water using dynamic light scattering (Malvern Zetasizer Nano ZS).

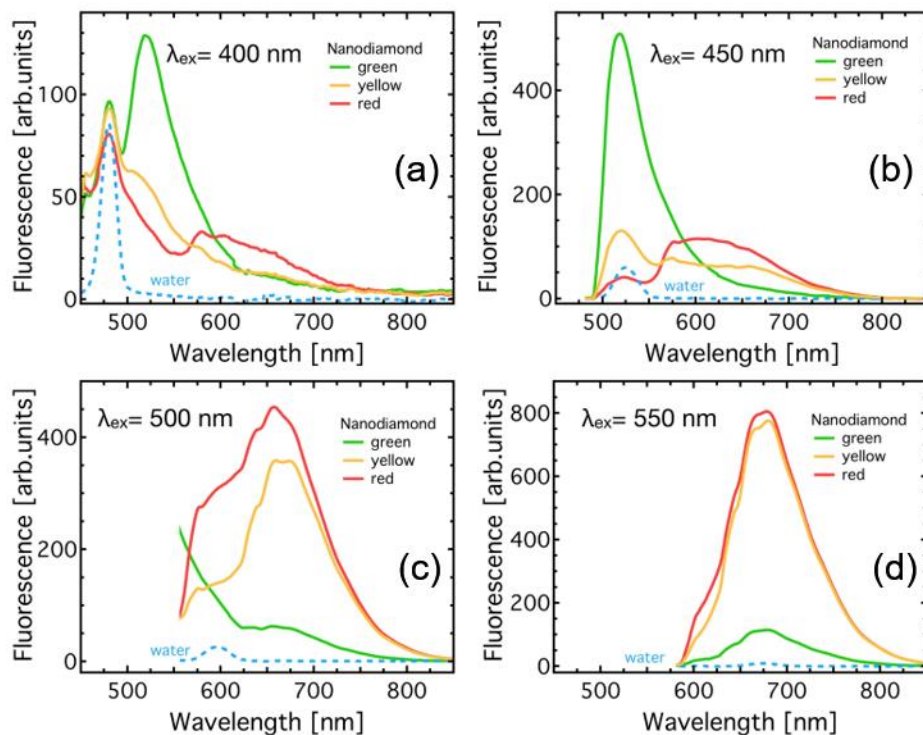

**Figure S2.** Laser excitation emission spectra for green, yellow, and red fluorescent diamonds in deionized water suspension at 400 nm (a), 450 nm (b), 500 nm (c), and 550 nm (d). Significant water Raman scattering intensity leads to artificial skewing of the emission spectra.

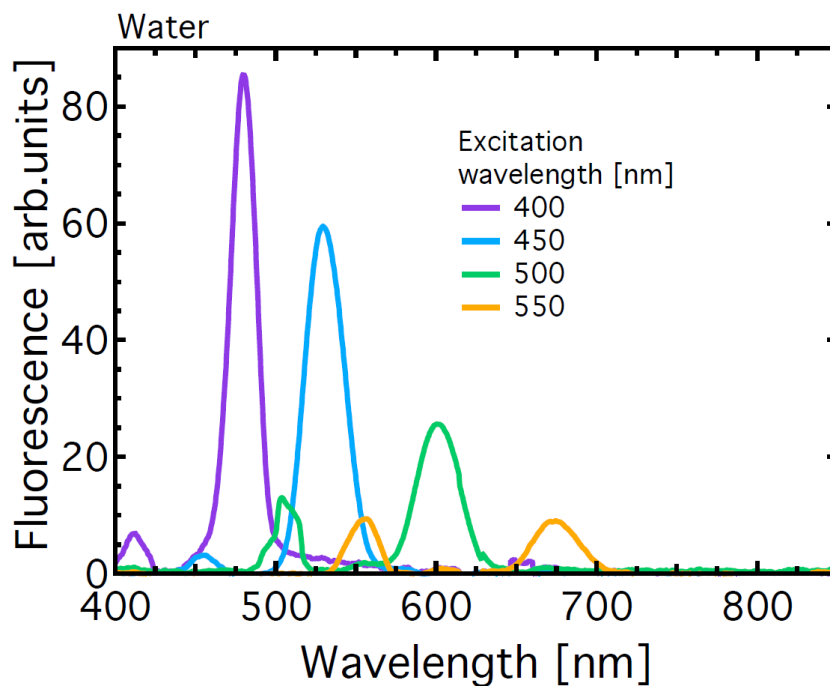

**Figure S3.** Laser excitation wavelength dependent water Raman scattering intensity.

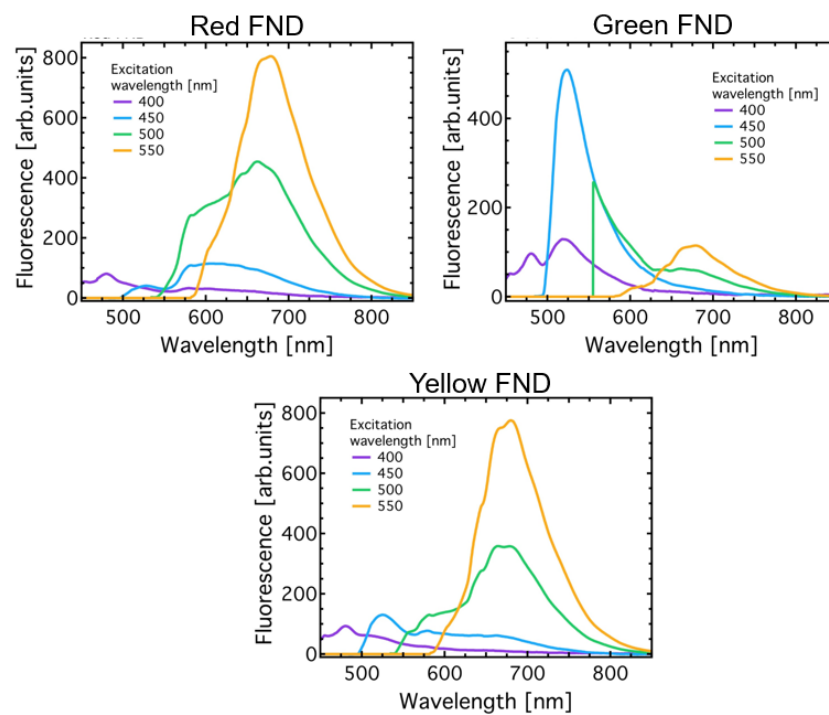

**Figure S4.** Excitation wavelength dependent emission spectra for red, green and yellow FNDs.

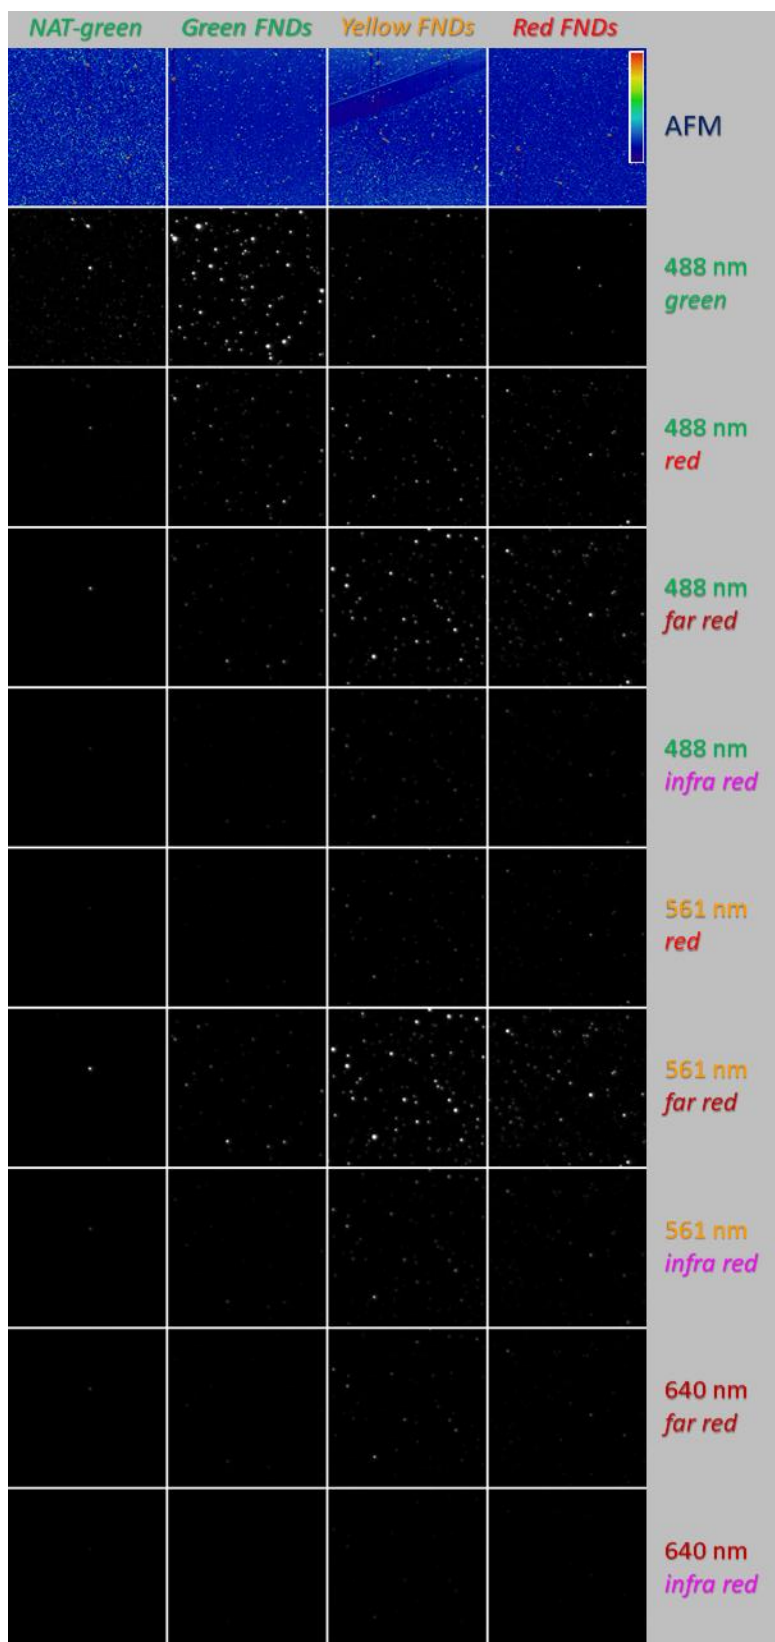

(a)

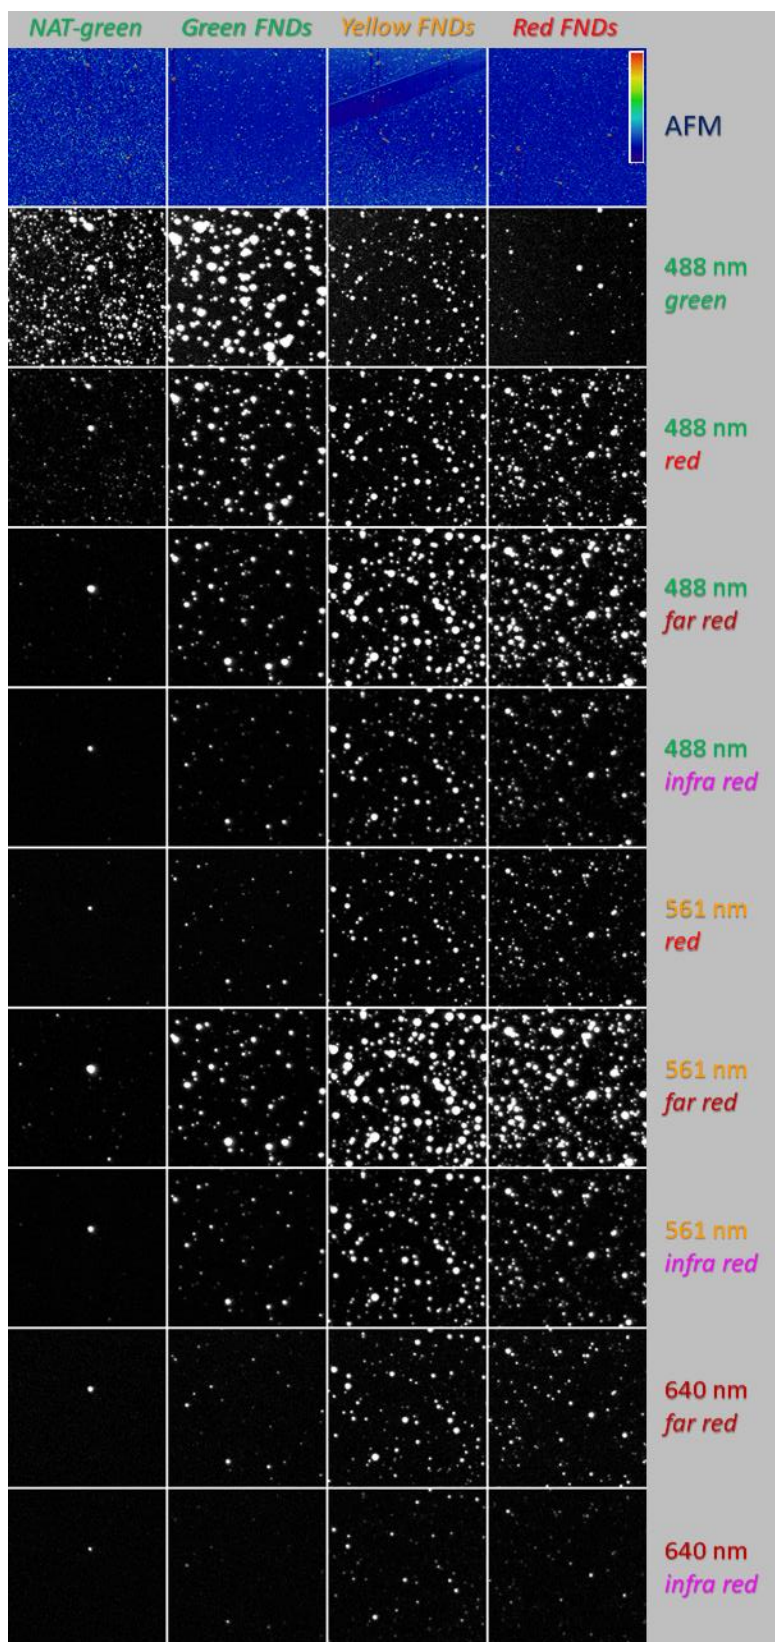

(b)



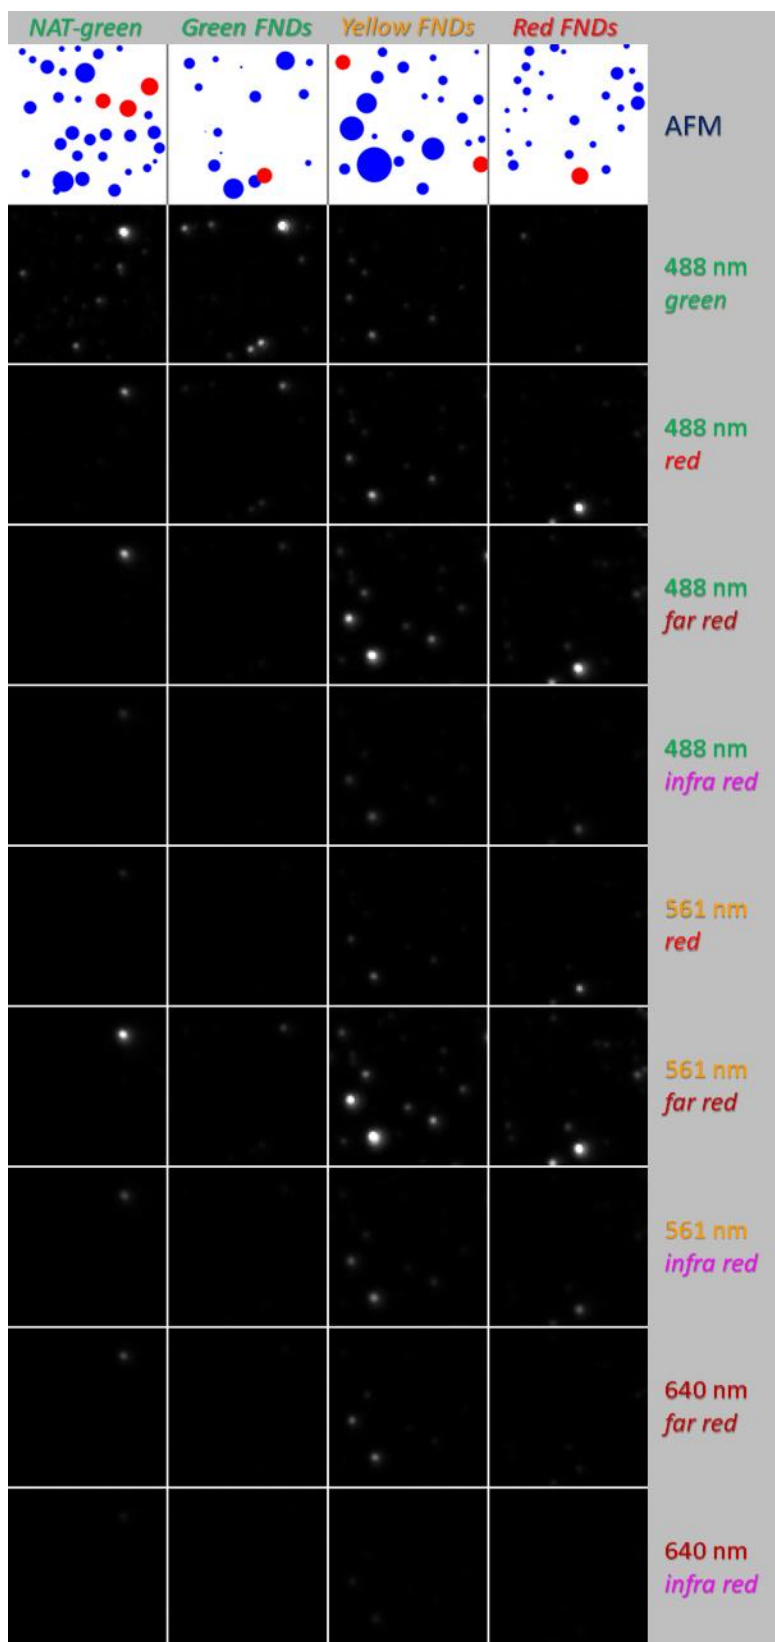

(c)

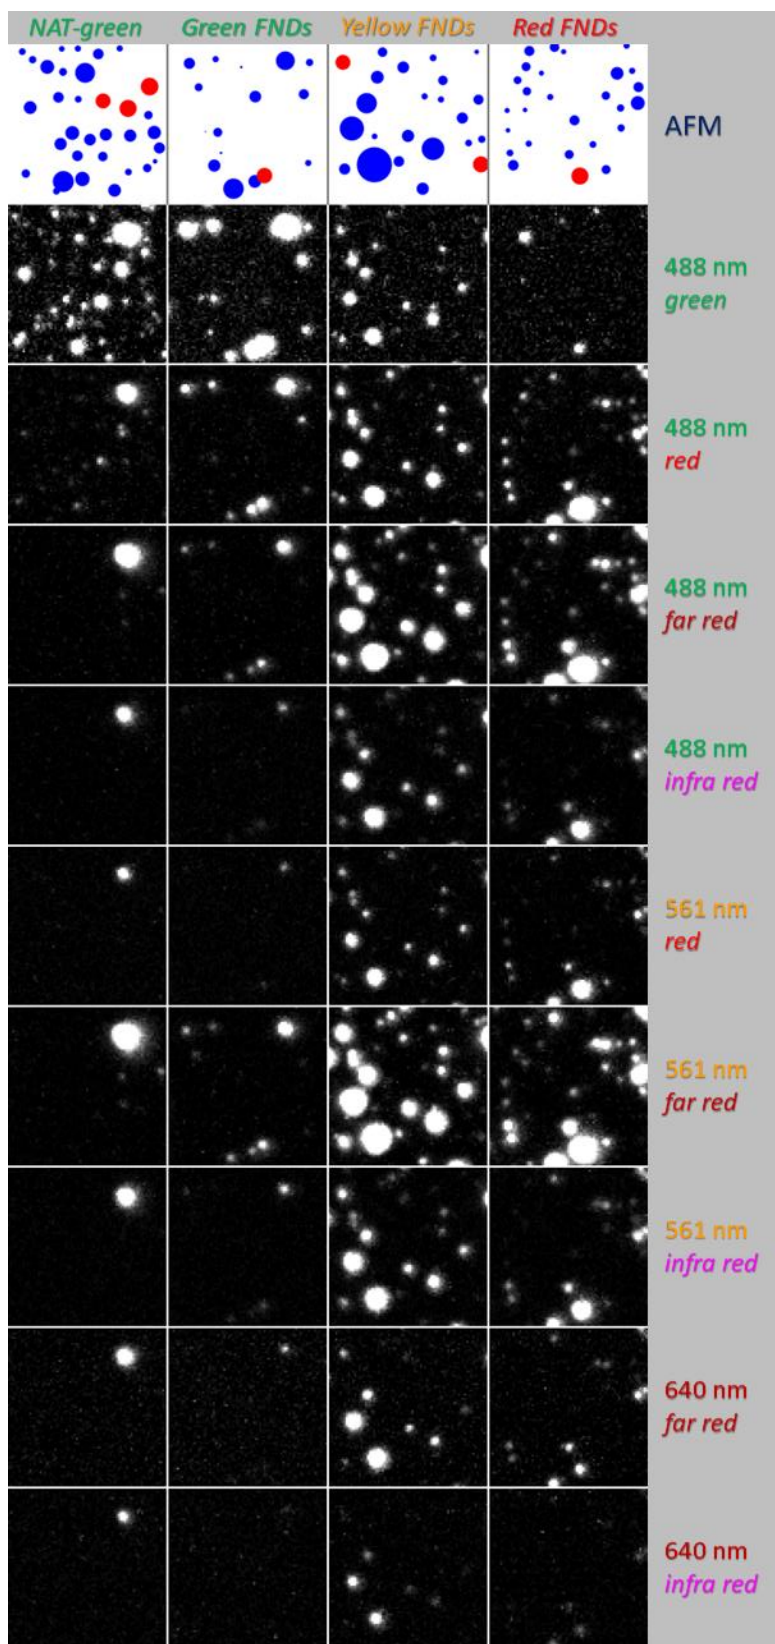

(d)

**Figure S5:** Correlative fluorescence microscopy and AFM of individual FNDs (red, yellow, green, NAT-green). Each field of FNDs was imaged with a spinning disk confocal microscope at different combinations of excitation laser and emission collection channels. For each excitation/emission combination, gray-levels are scaled up to present estimates of relative brightness per unit laser power per unit of emission bandwidth. Emission bands are typical spectral ranges used on commercial microscopes to collect “green” (e.g., GFP), “red” (e.g., RFP), “far red” (e.g., AF647) and “infra-red” (e.g., AF750) fluorescence signals (see MATLAB source code in Supplementary Information for details of grayscale adjustment).

- (a) Full field of correlative AFM and fluorescence microscopy. Each square is 30 x 30  $\mu\text{m}$ . Color range (violet to red) in AFM field corresponds to height (0–100 nm). Light microscopy contrast is adjusted to present brightest particles.
- (b) Same as (a), but contrast of light microscopy image is increased 25-fold, to present low intensity particles.
- (c) A crop within the fields presented in (a) and (b). Each square is 8.2 x 8.2  $\mu\text{m}$ . On the left, circles represent particles detected on AFM and qualified in MATLAB analysis, with diameter proportional to height. For reference, all particles between 80 nm and 100 nm are presented in red; particles outside of this diameter range are presented in blue. Light microscopy is presented with the same normalization as in (a).
- (d) Same as (c), but with the same normalization as in (b).

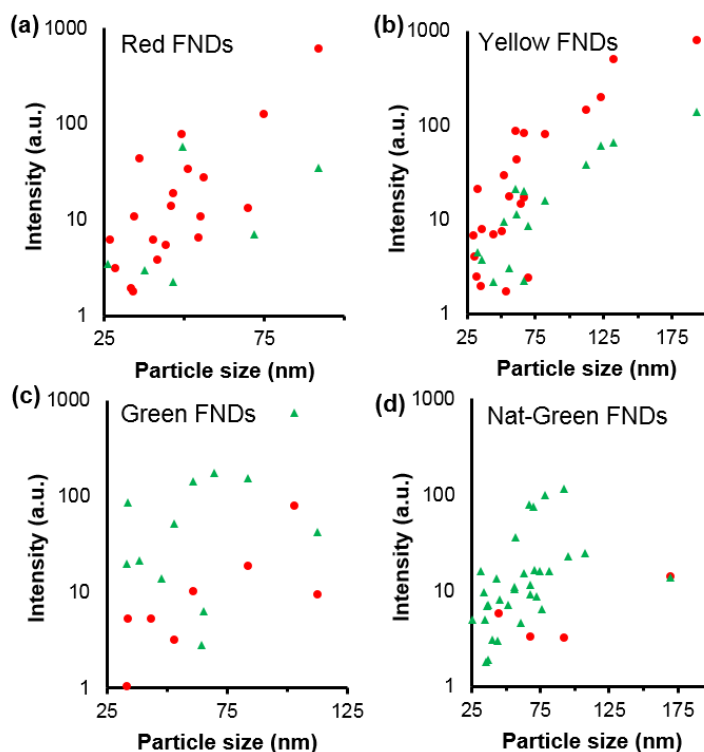

**Figure S6:** Scatter plots of particle intensity versus particle size for only fluorescent particles of each diamond type: (a) red FNDs, (b) yellow FNDs, (c) green FNDs, and (d) natural green FNDs. In each plot, the red circles represent fluorescent particles under 561 nm excitation with emission in the far-red channel, and the green triangles represent fluorescent particles under 488 nm excitation with emission in the green channel. For these plots, the green emission window under 488 nm excitation and the far-red emission window under 561 nm excitation were used. Only particles assigned a non-zero level of fluorescence by MATLAB were evaluated (see MATLAB source code in Supplementary Information). The fluorescence intensity generally increases with particle size, though there are some outliers. Analysis of many more particles correlated by size would improve the data quality; however, the general trend can still be observed in most cases. Red FNDs exhibit brighter fluorescence in the far-red channel as opposed to the green channel (a). Yellow FNDs exhibit a fluorescence brightness in the far-red channel that is similar to the red FNDs, but also exhibit higher brightness in the green channel (b). The fluorescence intensity of the RTA synthesized green FNDs is generally higher than that of the natural green FNDs in both the green and far-red channels (c-d). It should be noted that the particle sizes determined here as the AFM z-height of particles are generally much lower than sizes measured by DLS. This may be caused by a 'plate'-like shape of particles of, which often exhibit wider lateral dimension (in the x-y plane of the solid substrate) and significantly smaller z-heights as determined by AFM.<sup>19, 32</sup>

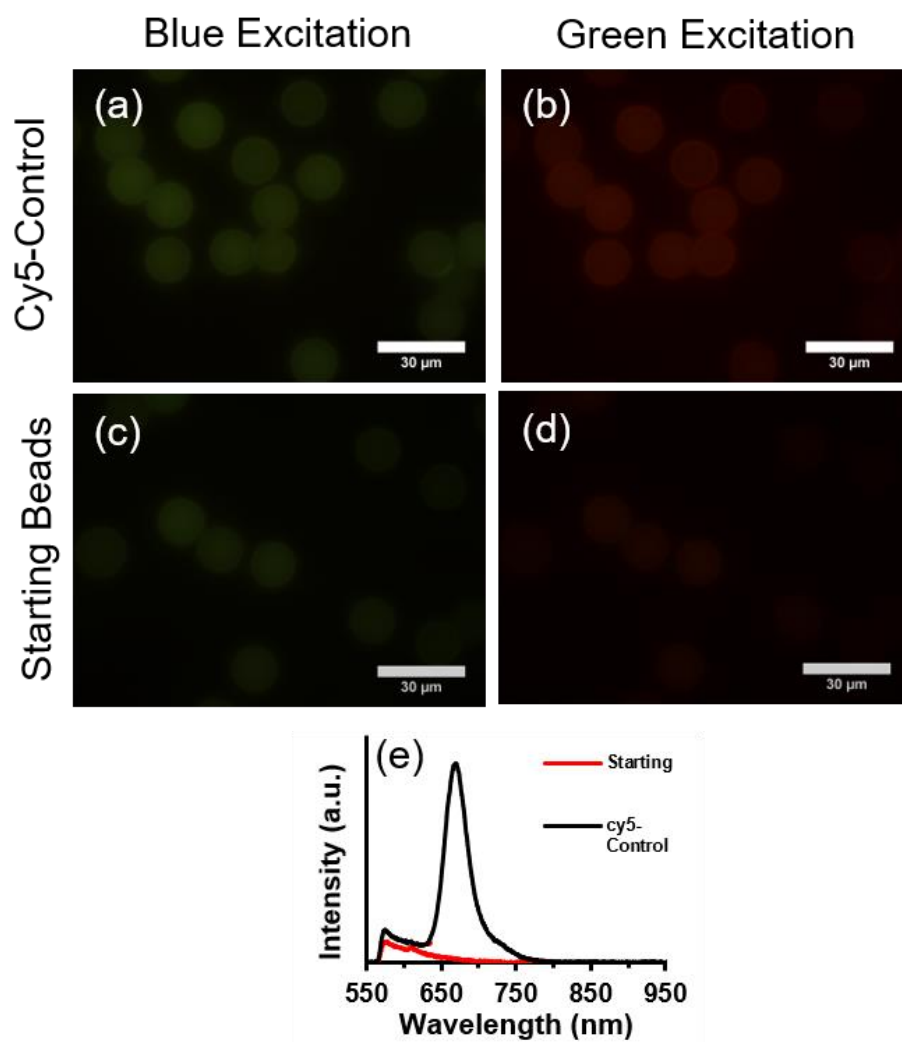

**Figure S7.** Validation of SA-Bead activity and uniformity using cy5-biotin control.

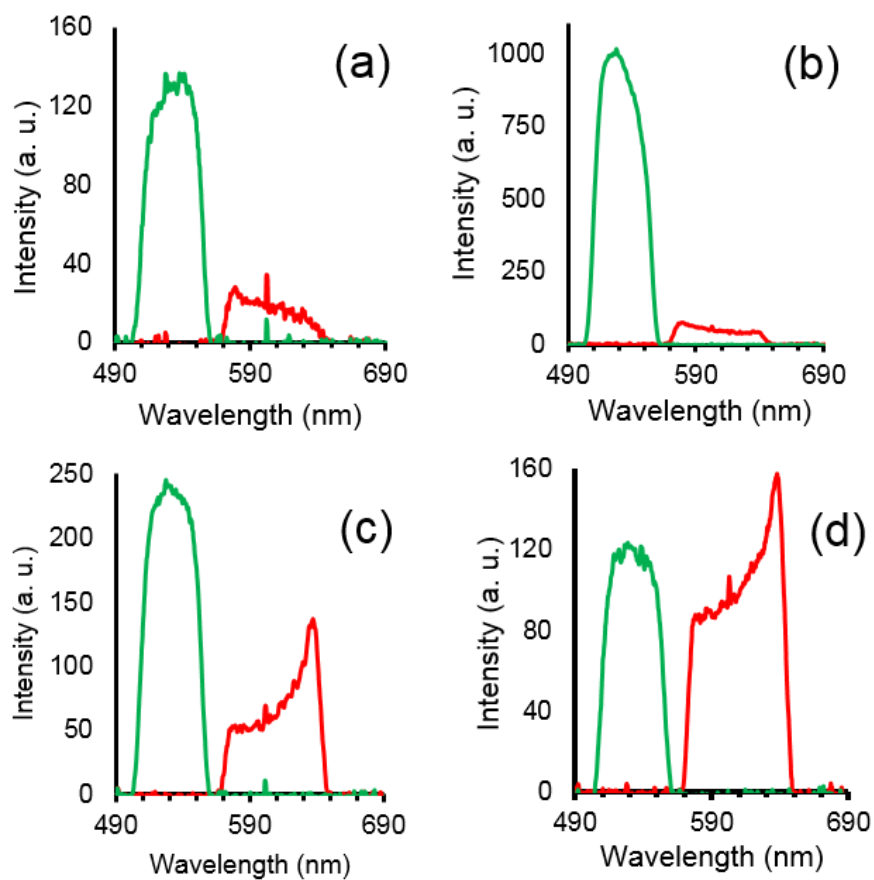

**Figure S8.** Emission spectra of (a) starting beads, (b) green labeled beads, (c) yellow labeled beads, and (d) red labeled beads under blue and green excitation with band pass emission filters specified in table S2.

## MATLAB Source Code for Image Processing

```
% This script is finding "particles" from a table exported from ThunderSTORM (last 2016
"dev" version)
% The algorithm excludes from consideration any spots which have more than one spot
in a vicinity (defined by variable "Radius") in any spectral channel.
% Therefore, only particles which happened to be well separated are analyzed.
% Previous steps:
% a. Z stack (250nm Z step, 4um Z range) was acquired for each of 10 spectral
channels, listed below.
% b. Maximum intensity projection for each stack was created in ImageJ.
% c. All 10 projections were assembled into a stack in ImageJ, to be analyzed in
ThunderSTORM.
% d. Thunderstorm was configured with "Camera Settings" according to manufacture
supplied datasheet, for translation of pixel intensities to photon counts.
% e. Analysis parameters in ThunderSTORM were set to defaults (2D, MLH fitting),
except for threshold, which was manually set to 5.
% f. Following filter was applied, to remove high noise peaks and peaks
% with width far from expected: (sigma > 50 & sigma < 200) & (intensity > 80) . Here
sigma is in nanometers, and intensity - in photons.
% g. The table was exported from ThunderSTORM as .csv file, with all fields checked in
the saving dialogue.
%

% Steps after this script
% a. Results files (.mat and .txt) can be integrated into data structures for further
analysis
% b. .csv "for ThunderSTORM" files can be "Imported" into ThunderSTORM,
% when original data Z stack is opened. This way "qualified" localizations
% from this script are overlaid as red crosses on the original data, allowing visual
inspection.

% Order of channels in this experiment:

% 1: 640-730
% 2: 640-640

% 3: 561-730
% 4: 561-640
% 5: 561-561

% 6: 488-730
% 7: 488-640
% 8: 488-561
% 9: 488-488
```





```

% Create holders for results
Results = []; % May be changed for pre-allocation for speed if needed
Accepted_localizations = [];

ID_X_Y_Int = cell(10,1); % to hold separate table for each spectral option

Reference_channels_order = [7 9 1:6 8 10]; % This order should not matter,
% but putting high polulation channel first should speed up the process.

for Reference_slice_number = Reference_channels_order
    for i=1:10
        ID_X_Y_Int{i} = ID_Frame_X_Y_Intensity( ID_Frame_X_Y_Intensity(:,2)== i, [1 3 4
5] );
    end

    Reference = ID_X_Y_Int{Reference_slice_number};

    % Create holders for results
    Results_per_ref = []; % May be changed for pre-allocation for speed if
needed
    Accepted_localization_IDs = [];
    Rejected_localization_IDs = [];
    List_of_rejected_multiples_IDs = [];

    % Loop via all particles in reference color image
    for i = 1:size(Reference,1)

        Xref = Reference(i,2);
        Yref = Reference(i,3);

        Intensity_vector = zeros(1,10);
        IDs_vector = zeros(1,10);

        More_than_one_spot = 0;

        % Loop via rest of colors (spectral combinations) for one point
        for j = [1:(Reference_slice_number-1) (Reference_slice_number+1):10]

            L = ID_X_Y_Int{j}; % Current spectral combination data
            Distances = ( (L(:,2)-Xref).^2 + (L(:,3)-Yref).^2 ).^0.5; % distances to all
localizations
            ind = find(Distances < Radius);
            N_hits = length(ind);

            if N_hits >= 2

```

```

    % Two or more localization within radius that only supposed to
    % have one particle. Data for this particle will be discarded
    More_then_one_spot = 1;
    List_of_rejected_multiples_IDs = [List_of_rejected_multiples_IDs ; L(ind,1)];
    %#ok<AGROW>
    else
        if N_hits == 0
            Intensity_vector(j) = 0; % intensity in this channel is below detection limit
            IDs_vector(j) = -1; % Non-existing ID number for situation where no
peak was found
        else % meaning N_hits == 1
            Intensity_vector(j) = L(ind,4);
            IDs_vector(j) = L(ind,1);
        end
    end
    end
    % Filling in seed localization ID from the reference layers, which need to be
excluded in runs with other reference layers
    IDs_vector(Reference_slice_number) = Reference(i,1);

    % Adding "valid" sequence to the list, which later will be checked again to remove
sequences which share a localization
    if ~More_then_one_spot
        Intensity_vector(Reference_slice_number) = Reference(i,4);
        Results_per_ref = [Results_per_ref ; Intensity_vector
Xref Yref ]; %#ok<AGROW>
        Accepted_localization_IDs = [Accepted_localization_IDs ; IDs_vector
]; %#ok<AGROW>
    else
        % our sequence of localization will not be added to results, but we have to
exclude considered localization from further analysis, at different reference channels
        Rejected_localization_IDs = [Rejected_localization_IDs ; IDs_vector
]; %#ok<AGROW>
        % This one will need to be later combined with rejected multiples
    end
end

Accepted_localization_vector_with_negative_ones = Accepted_localization_IDs(:); %
Make a linear array with all elements of the matrix included
% Remove all "-1" values
Accepted_localization_vector = Accepted_localization_vector_with_negative_ones(
Accepted_localization_vector_with_negative_ones ~= -1 );
sorted_Accepted_localizations_vector = sort(Accepted_localization_vector); %
Softing all frames from smaller to larger.
check_repetitions = diff(sorted_Accepted_localizations_vector); % It will produce
array of length N-1, with 0 in case same number is used twice.

```

% It means that same point is used more then ones, and all "particles" involved in this should be removed from results

```
List_of_Duplicating_IDs_with_repetitions =  
sorted_Accepted_localizations_vector(~check_repetitions);  
if ~isempty(List_of_Duplicating_IDs_with_repetitions)  
    List_of_Duplicating_IDs_without_repetitions =  
List_of_Duplicating_IDs_with_repetitions([true;  
logical(diff(List_of_Duplicating_IDs_with_repetitions))]);
```

% Now we have a list of all problematic localization, and need to remove corresponding "spectral particles" from Result table.

% Accepted\_localization\_IDs matrix was built at the same pattern as  
% Results\_per\_ref, so that we need to look which lines there contains problematic localizations

```
n_of_lines = size(Accepted_localization_IDs, 1);  
Accepted_Particles_Lines = true(n_of_lines , 1);  
Additional_Localization_To_Reject = [];  
  
for line_n = 1: n_of_lines  
    if ~isempty(intersect (Accepted_localization_IDs(line_n,:),  
List_of_Duplicating_IDs_without_repetitions) )  
        Accepted_Particles_Lines(line_n) = false;  
        Additional_Localization_To_Reject = [Additional_Localization_To_Reject  
Accepted_localization_IDs(line_n,:)] ; %#ok<AGROW>  
    end  
end
```

% Remove lines with duplication from Results\_per\_ref table  
Results\_per\_ref = Results\_per\_ref(Accepted\_Particles\_Lines,:);

```
sorted_Accepted_localizations_vector = setdiff(  
sorted_Accepted_localizations_vector, Additional_Localization_To_Reject);
```

end

```
Accepted_localizations = [Accepted_localizations ;  
sorted_Accepted_localizations_vector]; %#ok<AGROW>  
Results = [Results; Results_per_ref]; %#ok<AGROW>
```

```
Considered_IDs_with_negative_ones = [Accepted_localization_IDs(:);  
Rejected_localization_IDs(:); List_of_rejected_multiples_IDs(:)];  
Considered_IDs = Considered_IDs_with_negative_ones(  
Considered_IDs_with_negative_ones ~= -1 );
```

```
[ ~ , index_of_not_considered_localizations] = setdiff( ID_Frame_X_Y_Intensity(:,1) ,
Considered_IDs );
```

```
ID_Frame_X_Y_Intensity = ID_Frame_X_Y_Intensity(
index_of_not_considered_localizations , : );
disp(Reference_slice_number);
whos Res*
end
```

```
All_IDs_from_original_table = Table(:,1);
```

```
[~,index_of_lines_included_in_results, ~] = intersect( All_IDs_from_original_table,
Accepted_localizations );
```

```
Full_data = Table{:,,:}; % all data loaded from TS
% Only take lines with IDs which were used in the results
M = Full_data( index_of_lines_included_in_results ,:);
```

```
% "Order of magnitude" estimated correction for detection optical path
% channel 488 561 640 732nm regular excitation for this band
BandWidth = [30 50 75 90 ];
Cental_WL = [525 600 700 810 ];
QE = [0.8 0.81 0.71 0.47];
QE_used_in_TS_settings = 0.8;
QE_relative = QE / QE_used_in_TS_settings;
% Relative laser power estimated from the power measured above objective
% lens of dry objectives
% 405nm 488nm 561nm 640nm
Relative_laser_powers = [0.37 1.5 1.25 1 ];
```

```
Intensity_correction_coefficient = zeros(1,10);
% #1 640-732
Intensity_correction_coefficient(1) = QE_relative(4) * BandWidth(4)*
Relative_laser_powers(4);
% #2 640-640
Intensity_correction_coefficient(2) = QE_relative(3) * BandWidth(3)*
Relative_laser_powers(4);
% #3 561-732
Intensity_correction_coefficient(3) = QE_relative(4) * BandWidth(4)*
Relative_laser_powers(3);
% #4 561-640
Intensity_correction_coefficient(4) = QE_relative(3) * BandWidth(3)*
Relative_laser_powers(3);
% #5 561-561
```

```

Intensity_correction_coefficient(5) = QE_relative(2) * BandWidth(2)*
Relative_laser_powers(3);
% #6 488-732
Intensity_correction_coefficient(6) = QE_relative(4) * BandWidth(4)*
Relative_laser_powers(2);
% #7 488-640
Intensity_correction_coefficient(7) = QE_relative(3) * BandWidth(3)*
Relative_laser_powers(2);
% #8 488-561
Intensity_correction_coefficient(8) = QE_relative(2) * BandWidth(2)*
Relative_laser_powers(2);
% #9 488-488
Intensity_correction_coefficient(9) = QE_relative(1) * BandWidth(1)*
Relative_laser_powers(2);
% #10 405-561
Intensity_correction_coefficient(10)= QE_relative(2) * BandWidth(2)*
Relative_laser_powers(1);

% Adjust photon counts for collection efficiency
Results_Corr = Results;
Results_Norm = Results;
% Last two columns with X and Y values will not be altered
for i=1:size(Results,1)
    Results_Corr(i,1:10) = Results(i,1:10) ./ Intensity_correction_coefficient;
    Results_Norm(i,1:10) = Results_Corr(i,1:10) / sum(Results_Corr(i,1:10)) * 100;
end
disp('Time of data processing:');
toc

% Saving result table as both mat file and text file .csv

save( [ Save_Path_And_Name_Without_Extension '.txt' ], 'Results_Corr', '-ascii','-tabs');
save( [ Save_Path_And_Name_Without_Extension '.mat' ], 'Results_Corr',
'Results_Norm', 'filename','Radius','M');

% Export TS table which will only have localizations accepted by MATLAB

header_string = "id","frame","x [nm]","y [nm]","sigma [nm]","intensity [photon]","offset
[photon]","bkgstd [photon]","uncertainty_xy [nm]";
formatSpec = '%.1f,%.1f,%.10f,%.10f,%.10f,%.10f,%.10f,%.10f,%.10f,%s%s';

fileID = fopen([Save_Path_And_Name_Without_Extension '_for_TS_import.csv'],'w');
fprintf(fileID, '%s%s%s', header_string, char(13), newline );

n_lines = size(M,1);

```

```

for line_n = 1:n_lines
    fprintf(fileID, formatSpec,...
        M( line_n, 1), M( line_n, 2), M( line_n, 3), M( line_n, 4), M( line_n, 5), ...
        M( line_n, 6), M( line_n, 7), M( line_n, 8), M( line_n, 9), char(13) , newline    );
end
fclose(fileID);

if Show_only_NDs_with_signal_in_all_seven_488_561_excitations
    %remove lines with zeros in columns 3 to 9
    index = prod(Results_Corr(:,3:9), 2) ~=0; % here prod will multiply all numbers in
each line
    Results_Corr = Results_Corr( index, :); % Saved results will not be changed
    Results_Norm = Results_Norm( index, :);
end

% Define colors for each particle plot, based on its total intensity
figure(1);
c_table = colormap('jet');
colorbar;
figure(2);
colormap('jet');
colorbar;
TI = sum(Results_Corr(:,1:10),2); % Total intensity for each channel
sTI = sort(TI);
ind = round(length(TI)*percent_saturation/100);
colormap_index = ceil(TI/sTI(ind)*64); % Round does not work here, because index
cannot be zero in MATLAB.
    % This array has to have numbers from 1 to 64. No elemen of sTI
    % should be zero, so 1 should me min, and max in made 64 below:
colormap_index(colormap_index > 64) = 64;

% Plotting Results structure
% Cental_WL = [525 600 700 810 ];
x_1_2 = Cental_WL([4 3  ]); % For 640 excitation
x_3_4_5 = Cental_WL([4 3 2  ]); % For 561 excitation
x_6_7_8_9 = Cental_WL([4 3 2 1]); % For 488 excitation
x_10 = Cental_WL( 2 ); % For 405 excitation and 561nm band emission

if ~Skip_every_N_particle_in_plotting
    disp('All data will be plotted');
    N_to_skip = 1; % to plot every line
    h1 = zeros(size(Results,1) , 4);
    h2 = zeros(size(Results,1) , 4);
else
    disp('Only subset of the data will be plotted')
    disp(['N_to_skip variable is currently ' num2str(N_to_skip) ]);

```

```
N_point_to_be_plotted = length(1:N_to_skip:size(Results_Corr,1)); % Array used  
below in the FOR loop
```

```
h1 = zeros(N_point_to_be_plotted , 4);  
h2 = zeros(N_point_to_be_plotted , 4);  
end
```

```
figure(1); hold on
```

```
counter = 1;
```

```
for i=1:N_to_skip:size(Results_Corr,1)
```

```
    RGB = c_table( colormap_index( i ), :);
```

```
    % Get single particle data
```

```
    y= Results_Corr(i,1:10);
```

```
    h1(counter,1) = plot(x_1_2, y(1:2),'-', 'Color', RGB);
```

```
    h1(counter,2) = plot(x_3_4_5, y(3:5),'-', 'Color', RGB);
```

```
    h1(counter,3) = plot(x_6_7_8_9, y(6:9),'-', 'Color', RGB);
```

```
    h1(counter,4) = plot(x_10, y(10), '*', 'Color', RGB);
```

```
    counter = counter + 1;
```

```
end
```

```
figure(2); hold on
```

```
counter = 1;
```

```
for i=1:N_to_skip:size(Results_Norm,1)
```

```
    RGB = c_table( colormap_index( i ), :);
```

```
    % Get single particle data
```

```
    y= Results_Norm(i,1:10);
```

```
    h2(counter,1) = plot(x_1_2, y(1:2),'-', 'Color', RGB);
```

```
    h2(counter,2) = plot(x_3_4_5, y(3:5),'-', 'Color', RGB);
```

```
    h2(counter,3) = plot(x_6_7_8_9, y(6:9),'-', 'Color', RGB);
```

```
    h2(counter,4) = plot(x_10, y(10), '*', 'Color', RGB);
```

```
    counter = counter + 1;
```

```
end
```
